# Supplementary material for: Multiple social disadvantage does it have an effect on amenable mortality: a brief report
Source: Springer Nature journal article supplement (doi:10.1186/s12939-014-0067-5), 2014-07-31
Supplement: MOESM1 [file 9762344]

Additional file 1. List of causes of death considered amenable to health care and corresponding ICD codes.

| Cause of death                                        | Age <sup>1</sup> | ICD-9              | ICD-10           |
|-------------------------------------------------------|------------------|--------------------|------------------|
| Diphtheria, Tetanus, Poliomyelitis, and Varicella     | 1–74             | 032, 037, 045, 052 | A35–36, A80, B01 |
| Rubella                                               | 1–74             | 056                | B06              |
| Scarlatina                                            | 1–74             | 034                | A38              |
| Meningococcus                                         | 1–74             | 036                | A39              |
| Erysipelas                                            | 1–74             | 035                | A46              |
| Legionellosis                                         | 1–74             | 482.84             | A48.1            |
| Malaria                                               | 1–74             | 084                | B50–54           |
| Streptococcal pharyngitis                             | 1–74             | 034.0              | J02.0            |
| Cellulitis                                            | 1–74             | 681–682            | L03              |
| Tuberculosis                                          | 1–74             | 010–018, 137       | A15–A19, B90     |
| Melanoma of skin                                      | 1–74             | 172                | C43              |
| Malignant neoplasm of skin                            | 1–74             | 173                | C44              |
| Malignant neoplasm of breast                          | 1–74             | 174                | C50              |
| Malignant neoplasm of cervix uteri                    | 1–74             | 180                | C53              |
| Malignant neoplasm of cervix uteri and body of uterus | 1–44             | 179, 182           | C54–55           |
| Malignant neoplasms of colon and rectum               | 1–74             | 153–154            | C18–C21          |
| Malignant neoplasm of bladder                         | 1–74             | 188                | C67              |
| Benign tumours                                        | 1–74             | 210–229            | D10–36           |
| Hypertensive disease                                  | 1–74             | 401–405            | I10–13, I15      |
| Cerebrovascular disease                               | 1–74             | 430–438            | I60–69           |

|                                                |       |                                                              |                           |
|------------------------------------------------|-------|--------------------------------------------------------------|---------------------------|
| Diseases of the thyroid                        | 1–74  | 240–246                                                      | E00–07                    |
| Diabetes mellitus                              | 1–49  | 250                                                          | E10–14                    |
| Epilepsy                                       | 1–74  | 345                                                          | G40–41                    |
| Asthma                                         | 15–49 | 493                                                          | J45–46                    |
| COPD                                           | 15–49 | 490–492, 496                                                 | J40–44                    |
| Septicaemia                                    | 1–74  | 038                                                          | A40–41                    |
| Malignant neoplasm of testis                   | 1–74  | 186                                                          | C62                       |
| Hodgkin’s disease                              | 1–74  | 201                                                          | C81                       |
| Leukaemia                                      | 1–44  | 204–208                                                      | C91–95                    |
| Rheumatic and other valvular heart disease     | 1–74  | 390–398                                                      | I01–09                    |
| Influenza                                      | 1–74  | 487                                                          | J09–11                    |
| Pneumonia                                      | 1–74  | 480–486                                                      | J12–18                    |
| Peptic ulcer                                   | 1–74  | 531–534                                                      | K25–28                    |
| Appendicitis                                   | 1–74  | 540–543                                                      | K35–38                    |
| Abdominal hernia                               | 1–74  | 550–553                                                      | K40–46                    |
| Cholelithiasis and cholecystitis               | 1–74  | 574–575.1                                                    | K80–81                    |
| Nephritis, nephrosis, and nephropathy          | 1–74  | 580–589                                                      | N00–N09, N17–N19, N25–N27 |
| Obstructive uropathy and prostatic hyperplasia | 1–74  | 592, 593.7, 594,<br>598.0–598.1, 598.8-<br>598.9, 599.6, 600 | N13, N20–N21, N35, N40    |
| Maternal death                                 | All   | 630–676                                                      | O00–O99                   |
| Congenital cardiovascular anomalies            | 1–74  | 745–747                                                      | Q20–Q28                   |

---

<sup>1</sup>In our study, deaths of people under 25 years and over 59 were excluded from the analyses.
